# Supplementary material for: First Theoretical Realization of a Stable Two-Dimensional Boron Fullerene Network
Source: MDPI journal article supplement (doi:10.3390/app13031672), 2023-01-28
Supplement: s1 [file s1]

Supporting information

# First theoretical realization of a stable two-dimensional boron fullerene network

Bohayra Mortazavi

*Department of Mathematics and Physics, Leibniz Universität Hannover, Appelstraße 11,  
30167 Hannover, Germany.*

Corresponding author's email: bohayra.mortazavi@gmail.com

## Atomic structures in VASP POSCAR format

B40-0D-Cage

```
1.0000000000000000
17.0000000000000000 0.0000000000000000 0.0000000000000000
0.0000000000000000 17.0000000000000000 0.0000000000000000
0.0000000000000000 0.0000000000000000 17.0000000000000000
```

B

40

Direct

```
0.1330105614824090 0.3959987184940038 0.2576396799855864
0.1371201163535837 0.2353125840353608 0.0665709506697186
0.1520241042248078 0.3754324254076066 0.1636981074810667
0.3375812267318953 0.0745822597380730 0.2576337350537583
0.2352785791860890 0.1371113451764287 0.4040069467094546
0.0795187048450649 0.2352945362327424 0.3510480086874986
0.3743724659547911 0.1835653769035663 0.1361994339766286
0.3754314024773693 0.3185553405734380 0.3069085171535864
0.3376078447892418 0.3959936644138250 0.2576592394120089
0.3334895608354392 0.2353021826703675 0.0665874286140623
0.3185802964154241 0.3754210315866149 0.1637189536450961
0.0745898282279578 0.1330141429772582 0.2129364132565735
0.1520075449605762 0.0951747974003547 0.1636778214994509
0.3185696691786417 0.0951631046050562 0.1636903536373306
0.2870074468764025 0.0962200956142755 0.3343903803008363
0.1835716199709882 0.3743595468324896 0.3343966469432842
0.3743753627475776 0.2870179006529960 0.1362148380512212
0.1835606384741723 0.0962244404343296 0.3343865240064801
0.2352884516033217 0.0795475735345147 0.1195161841063280
0.0745891013584442 0.3376082081838088 0.2129415358748221
0.0962249575443953 0.2870328646214781 0.1361885439351155
0.0962240803917698 0.1835852457033618 0.1361824346352944
0.3754240240068352 0.1519972478366095 0.3068997384006957
0.0951565491061315 0.3185736247366504 0.3068764511193366
0.0951531618966121 0.1520197553734834 0.3068745005522546
0.2875885853302832 0.1527116006643678 0.0856971121279627
0.1830021383092307 0.1527133493078042 0.0856807643271598
0.1329987675476966 0.0746006712981081 0.2576194424490655
0.1526788864874462 0.1830012969782551 0.3848845599649228
0.3910544581645310 0.2352740518421853 0.3510777696190739
0.2870213065306005 0.3743491065286574 0.3344026089724764
0.2875981025056026 0.3178925447663605 0.0857093617197973
0.1830169026932615 0.3179013504664847 0.0856993779692783
0.1526818375314718 0.2875757198756134 0.3848842814191374
0.3959963399008395 0.1329884434595336 0.2129546908389217
0.2353089523943775 0.3910601513263025 0.1195353997942799
0.3178852536739035 0.1829895716706370 0.3849016161707127
0.2352840418012586 0.3334496681034413 0.4040043722732772
0.3960125214366992 0.3375866846651316 0.2129707942115983
0.3178852671704780 0.2875625707201727 0.3848992270230936
```

B40-2D-netwok

1.000000000000000

7.637699999999997

0.000000000000000

0.000000000000000

0.000000000000000

7.637699999999997

0.000000000000000

0.000000000000000

0.000000000000000

20.000000000000000

B

40

Direct

|                    |                    |                    |
|--------------------|--------------------|--------------------|
| 0.3282865740955856 | 0.9605448433583987 | 0.5216164626161515 |
| 0.3797534530407631 | 0.5714266762760403 | 0.3640258531068739 |
| 0.3817854988048666 | 0.8759886305913156 | 0.4454149656160240 |
| 0.8145710534249986 | 0.1823126758771920 | 0.5216177242960924 |
| 0.5714291902542925 | 0.3797624241354995 | 0.6400966889691944 |
| 0.1857276706825033 | 0.5714311453153584 | 0.6018243331093487 |
| 0.8494775044432785 | 0.4598516436384514 | 0.4266196246794465 |
| 0.8759912350277901 | 0.7610877566143444 | 0.5587040670441752 |
| 0.8145728512165178 | 0.9605453508577497 | 0.5216160892075976 |
| 0.7631000050057253 | 0.5714269432054806 | 0.3640253711419916 |
| 0.7610752361174136 | 0.8759904722315781 | 0.4454142112615500 |
| 0.1823122607134522 | 0.3282660598015354 | 0.4824996097844050 |
| 0.3817828331626103 | 0.2668649100957836 | 0.4454154894351063 |
| 0.7610704807943449 | 0.2668663498265644 | 0.4454159938396813 |
| 0.6830026534743894 | 0.2933781573296486 | 0.5775053214456563 |
| 0.4598572459599453 | 0.8494805389895248 | 0.5775033107347838 |
| 0.8494796777840108 | 0.6830045369468465 | 0.4266179501320551 |
| 0.4598549817107411 | 0.2933767628565391 | 0.5775060630848614 |
| 0.5714265663523150 | 0.1857114758459630 | 0.4022708407320721 |
| 0.1823145050682697 | 0.8145903943787260 | 0.4824986265736229 |
| 0.2933799071666670 | 0.6830033945430429 | 0.4266199877067791 |
| 0.2933763394039204 | 0.4598506049061584 | 0.4266196652075962 |
| 0.8759904547193500 | 0.3817709558385047 | 0.5587049437515006 |
| 0.2668691750784049 | 0.7610878257198266 | 0.5587051851139790 |
| 0.2668683106975678 | 0.3817700580616119 | 0.5587051991454501 |
| 0.6883702181595979 | 0.3721013044059305 | 0.3782866121744277 |
| 0.4544808834649032 | 0.3720992125048710 | 0.3782855531628826 |
| 0.3282862412646992 | 0.1823127348958238 | 0.5216178612405571 |
| 0.3721068285254390 | 0.4544982675463132 | 0.6258348753581444 |
| 0.9571330918213903 | 0.5714298544470253 | 0.6018237184547530 |
| 0.6830040033023295 | 0.8494821159927000 | 0.5775038107787225 |
| 0.6883733300578712 | 0.7707545066848382 | 0.3782851572066122 |
| 0.4544852834188688 | 0.7707518169064684 | 0.3782857240201523 |
| 0.3721094087387513 | 0.6883615458196246 | 0.6258347075359865 |
| 0.9605428719690394 | 0.3282673972468899 | 0.4824987736938553 |
| 0.5714284893496284 | 0.9571411975442672 | 0.4022701181196950 |
| 0.7707519329273609 | 0.4544986694729118 | 0.6258344471184074 |
| 0.5714305008712017 | 0.7631007073464104 | 0.6400958462794151 |
| 0.9605459040756230 | 0.8145904910427859 | 0.4824973977873199 |
| 0.7707527088535642 | 0.6883626669014262 | 0.6258346063330436 |
